# Supplementary material
Source: HighWire-hosted journal article supplement (https://jnm.snmjournals.org/highwire/filestream/95130/field_highwire_adjunct_files/0/187021_Supplemental_Data.pdf)
Supplement: 187021_Supplemental_Data.pdf [file 187021_Supplemental_Data.pdf]

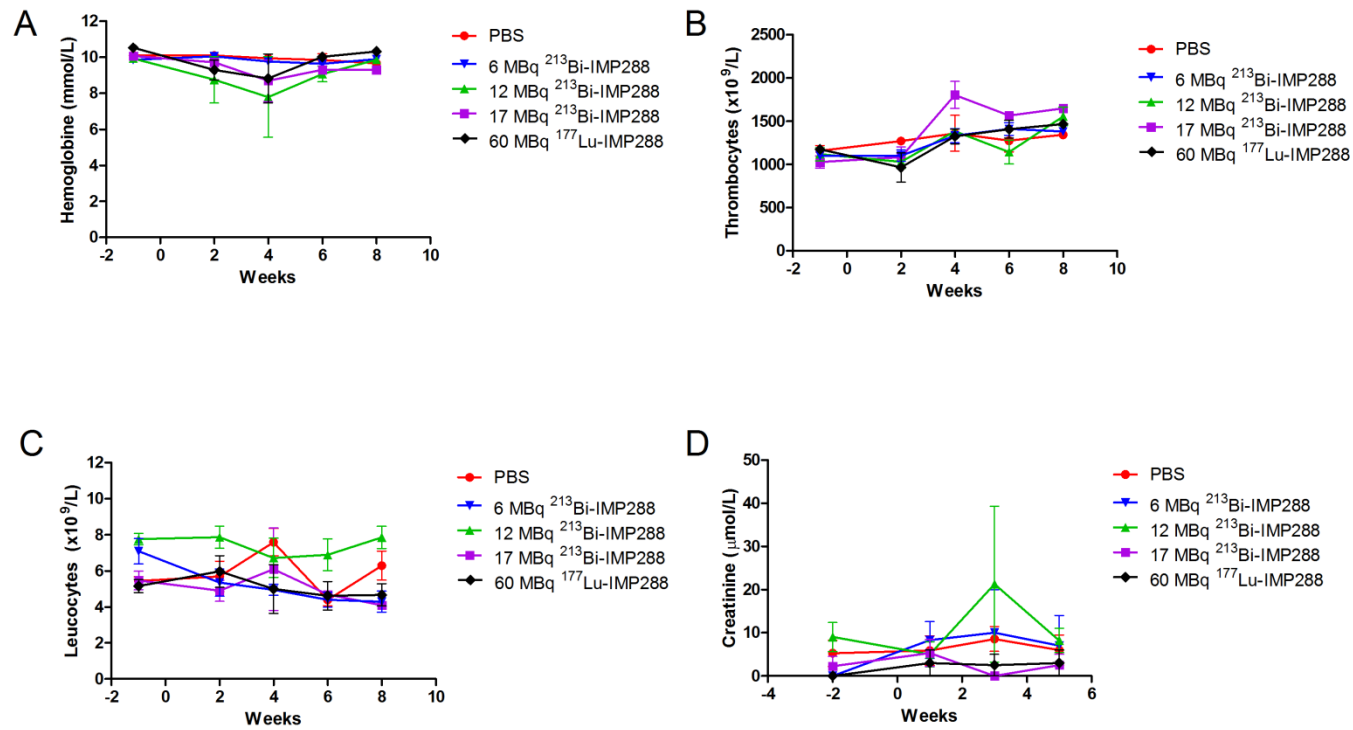

**Supplemental Figure 1.** Hemoglobin (A), thrombocytes (B), leucocytes (C) and creatinine levels (D) in mice treated with TF2 and different activities of <sup>213</sup>Bi-IMP288 or <sup>177</sup>Lu-IMP288. Treatment was administered in week 0.

**Supplemental Table 1.** The number of animals taken out of the experiment based on the predefined criteria of weight loss and tumor growth.

| Criteria to remove animal from experiment                       | PBS | 6 MBq <sup>213</sup> Bi-IMP288 | 12 MBq <sup>213</sup> Bi-IMP288 (0.14 nmol) | 12 MBq <sup>213</sup> Bi-IMP288 (0.28 nmol) | 17 MBq <sup>213</sup> Bi-IMP288 | 60 MBq <sup>177</sup> Lu-IMP288 |
|-----------------------------------------------------------------|-----|--------------------------------|---------------------------------------------|---------------------------------------------|---------------------------------|---------------------------------|
| Weight loss (>20% compared with baseline or >15% within 2 days) | 5/8 | 6/8                            | 4/8                                         | 3/8                                         | 1/8                             | 3/8                             |
| Tumor size ≥ 2 cm <sup>3</sup>                                  | 2/8 | 2/8                            | 3/8                                         | 3/8                                         | 0/8                             | 5/8                             |
| Tumor ulceration                                                | 1/8 | 0/8                            | 1/8                                         | 2/8                                         | 7/8                             | 0/8                             |
